# Supplementary material
Source: PubMed Central journal article supplement (PMC4794071)
Supplement: whie024783.ww1_default.pdf [file whie024783.ww1_default.pdf]

**Appendix: Supplementary tables [posted as supplied by author]**

**Table A.** Subgroup analyses, adjusted according to primary hierarchical logistic regression model. Values are presented as odds ratio (95% confidence interval). Only selected variables besides the primary analysis are included for clarity; the remainder of the odds ratios were substantially similar among the different models. A, excluding patients transfused two or more units of blood. Outcome is the composite outcome of stroke, MI, and VT/VF. B, including only day-of-surgery transfusions as the primary predictor, and excluding all patients who received a transfusion on postoperative day 1. C, limiting prediction to individual outcomes. D, primary hierarchical logistic regression model as presented in the manuscript, for comparison.

| Population                       |          | A                                | B                                 | C                          |                            |                            | D                          |
|----------------------------------|----------|----------------------------------|-----------------------------------|----------------------------|----------------------------|----------------------------|----------------------------|
| Day-of-surgery transfusions only |          | Day-of-surgery transfusions only | Excluding transfusion of ≥2 units | All patients               |                            |                            | All patients               |
| Outcome                          |          | Composite                        | Composite                         | Stroke                     | MI                         | VT/VF                      | Composite                  |
| N (outcome)                      |          | 7,680                            | 7,828                             | 2,879                      | 1,139                      | 4,269                      | 8,044                      |
| RBC use                          | 1 unit   | <b>2.64 (2.05 to 3.39)</b>       | <b>2.03 (1.55 to 2.66)</b>        | <b>1.85 (1.30 to 2.62)</b> | <b>2.36 (1.37 to 4.04)</b> | <b>2.85 (2.17 to 3.74)</b> | <b>2.33 (1.90 to 2.86)</b> |
|                                  | 2 units  | <b>2.31 (1.84 to 2.92)</b>       | N/A                               | <b>1.76 (1.32 to 2.36)</b> | <b>2.98 (1.94 to 4.57)</b> | <b>2.76 (2.19 to 3.48)</b> | <b>2.37 (2.00 to 2.81)</b> |
|                                  | 3 units  | <b>2.94 (1.89 to 4.57)</b>       |                                   | <b>3.22 (1.92 to 5.37)</b> | <b>4.14 (1.99 to 8.58)</b> | <b>3.19 (2.05 to 4.95)</b> | <b>3.13 (2.28 to 4.31)</b> |
|                                  | 4+ units | <b>4.37 (3.18 to 6.01)</b>       |                                   | <b>3.89 (2.55 to 5.92)</b> | <b>4.32 (2.29 to 8.15)</b> | <b>5.47 (4.05 to 7.39)</b> | <b>4.87 (3.86 to 6.14)</b> |
| Cerebrovascular disease          |          | <b>8.16 (7.54 to 8.83)</b>       | <b>8.17 (7.55 to 8.84)</b>        | <b>27.2 (24.8 to 29.9)</b> | 1.24 (0.85 to 1.80)        | <b>1.60 (1.33 to 1.92)</b> | <b>8.20 (7.58 to 8.87)</b> |
| CAD or MI history                |          | <b>2.04 (1.94 to 2.15)</b>       | <b>2.05 (1.94 to 2.15)</b>        | <b>1.13 (1.04 to 1.24)</b> | <b>5.82 (5.07 to 6.67)</b> | <b>2.33 (2.17 to 2.49)</b> | <b>2.05 (1.95 to 2.16)</b> |

Abbreviations: MI, myocardial infarction. VT/VF, ventricular tachycardia or ventricular fibrillation. CAD, coronary artery disease. PNS, peripheral nervous system. Ortho, orthopedic surgery.

**Table B.** Sensitivity analysis to elucidate impact of unknown MSBOS values on propensity score model.

| Variable                             | Hierarchical logistic regression | Propensity score matched   |                            |                                                |             |                                 |             |
|--------------------------------------|----------------------------------|----------------------------|----------------------------|------------------------------------------------|-------------|---------------------------------|-------------|
|                                      |                                  | Without MSBOS              |                            | Including only patients with known MSBOS value |             | Reported propensity score model |             |
|                                      |                                  | Not transfused             | Trans-fused                | Not transfused                                 | Trans-fused | Not transfused                  | Trans-fused |
| AUC ROC for propensity model         | N/A                              | 0.688                      |                            | 0.722                                          |             | 0.715                           |             |
| Number of patients                   | 1,583,819                        | 41,421                     | 41,421                     | 37,178                                         | 37,178      | 41,421                          | 41,421      |
| Number of patients with stroke/MI    | 8,044                            | 314 (0.76%)                | 496 (1.2%)                 | 268 (0.72%)                                    | 414 (1.1%)  | 341 (0.82%)                     | 496 (1.2%)  |
| Adjusted odds ratios for stroke/MI** | 1 unit                           | <b>2.33 (1.90 to 2.86)</b> | <b>2.05 (1.55 to 2.70)</b> | <b>1.85 (1.38 to 2.48)</b>                     |             | <b>1.71 (1.31 to 2.24)</b>      |             |
|                                      | 2 units                          | <b>2.37 (2.00 to 2.81)</b> | <b>2.04 (1.59 to 2.62)</b> | <b>1.94 (1.49 to 2.53)</b>                     |             | <b>1.73 (1.36 to 2.20)</b>      |             |
|                                      | 3 units                          | <b>3.13 (2.28 to 4.31)</b> | <b>2.64 (1.83 to 3.81)</b> | <b>2.48 (1.66 to 3.69)</b>                     |             | <b>2.24 (1.56 to 3.22)</b>      |             |
|                                      | 4+ units                         | <b>4.87 (3.86 to 6.14)</b> | <b>3.70 (2.74 to 4.99)</b> | <b>3.40 (2.44 to 4.74)</b>                     |             | <b>3.16 (2.36 to 4.23)</b>      |             |

Univariate (chi squared) p-value comparing stroke/MI rate between those transfused and those not transfused was <0.001 for all three propensity score models. Abbreviations: MSBOS, maximum surgical blood ordering schedule. AUC ROC, area under the curve of the receiver operating characteristic curve. MI, myocardial infarction.
